# Supplementary material
Source: publisher figshare collection journal article supplement (https://acs.figshare.com/ndownloader/files/14746475)
Supplement: Supplementary file 1 [file 14746475]

## Supporting Information

# Iterative Non-Negative Matrix Factorization Filter for Blind Deconvolution in Photon/Ion Counting

Scott R. Griffin<sup>†</sup>, John A. Biechele-Speziale<sup>†</sup>, Casey J. Smith<sup>†</sup>, Ximeng You-Dow<sup>‡</sup>, Julia K. White<sup>†</sup>,  
Si-Wei Zhang<sup>‡</sup>, Julie Novak<sup>‡</sup>, Zhen Liu<sup>‡</sup>, Garth J. Simpson<sup>\*†</sup>

<sup>†</sup>Purdue University, West Lafayette, IN, USA 47906

<sup>‡</sup>Merck & Co., Inc., Kenilworth, NJ, USA 07033

E-mail: [gsimpson@purdue.edu](mailto:gsimpson@purdue.edu)

### Additional Information on the receiver-operator curve (ROC) Plots:

ROC plots were created using simulations with known ground truth outcomes. Simulated data were generated by first creating a vector of photon positions, created by applying a Poisson distribution with a constant  $\lambda$  value to the entire data trace (length of 500,000 data points), in which  $\lambda$  is the mean number of expected events per time point. This vector of photon positions was then convolved with the simulated IRF, given by an exponentially decaying comb with points every 10 data points. The length of the IRF vector was 100 data points. The simulated data were 500,000 data points in length.

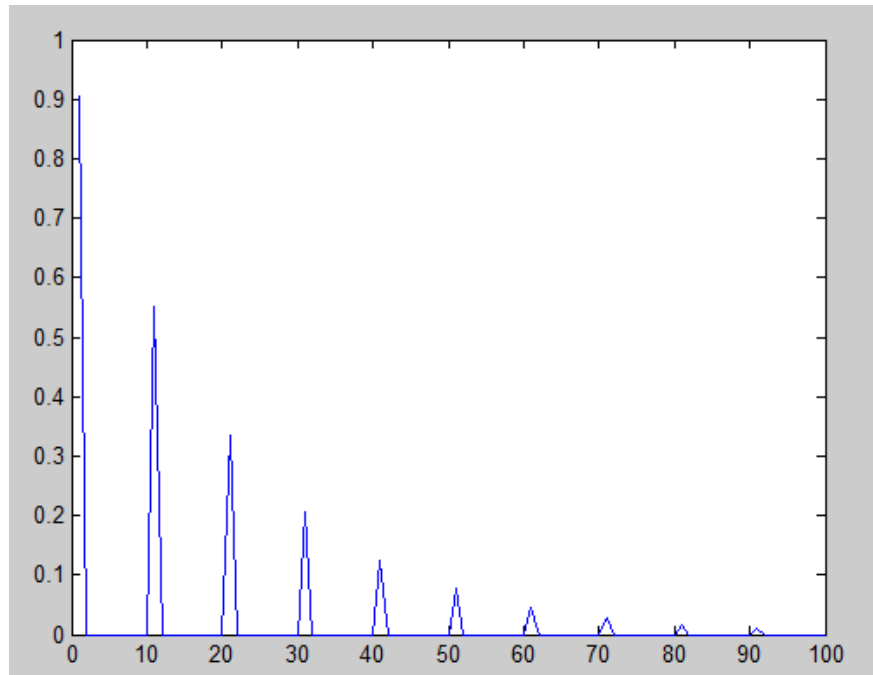

Figure S1: Instrument response function (IRF) used to generate the simulated data.

First simulated data set:

$\lambda = 0.01$

True Number of photon events: 4972

Threshold was varied from 0.1 to 1 with a step size of 0.003

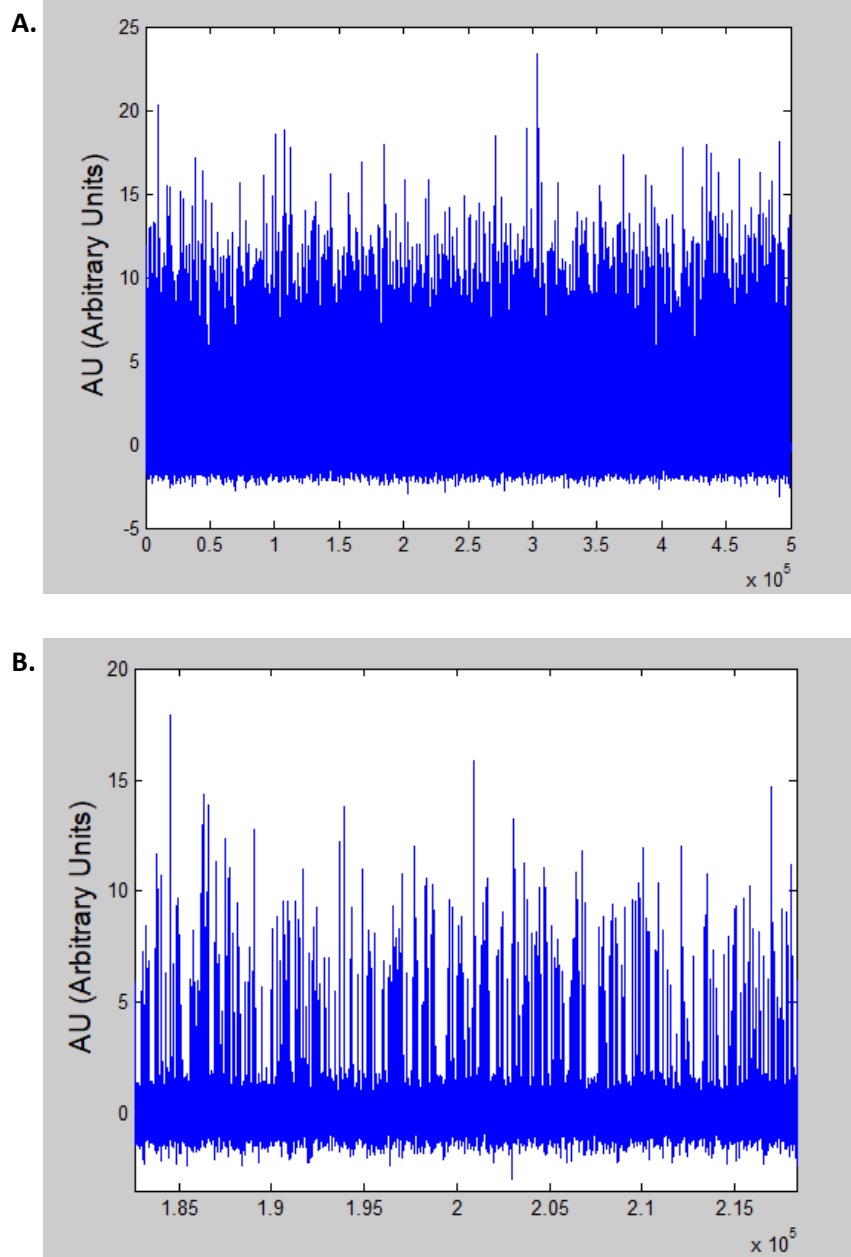

Figure S2: A) Entire simulated data trace with  $\lambda = 0.01$ . B) Zoomed in section to show detail.

Second simulated data set:

$\lambda = 0.1$

True Number of photon events: 47361

Threshold was varied from 0.1 to 1 with a step size of 0.001

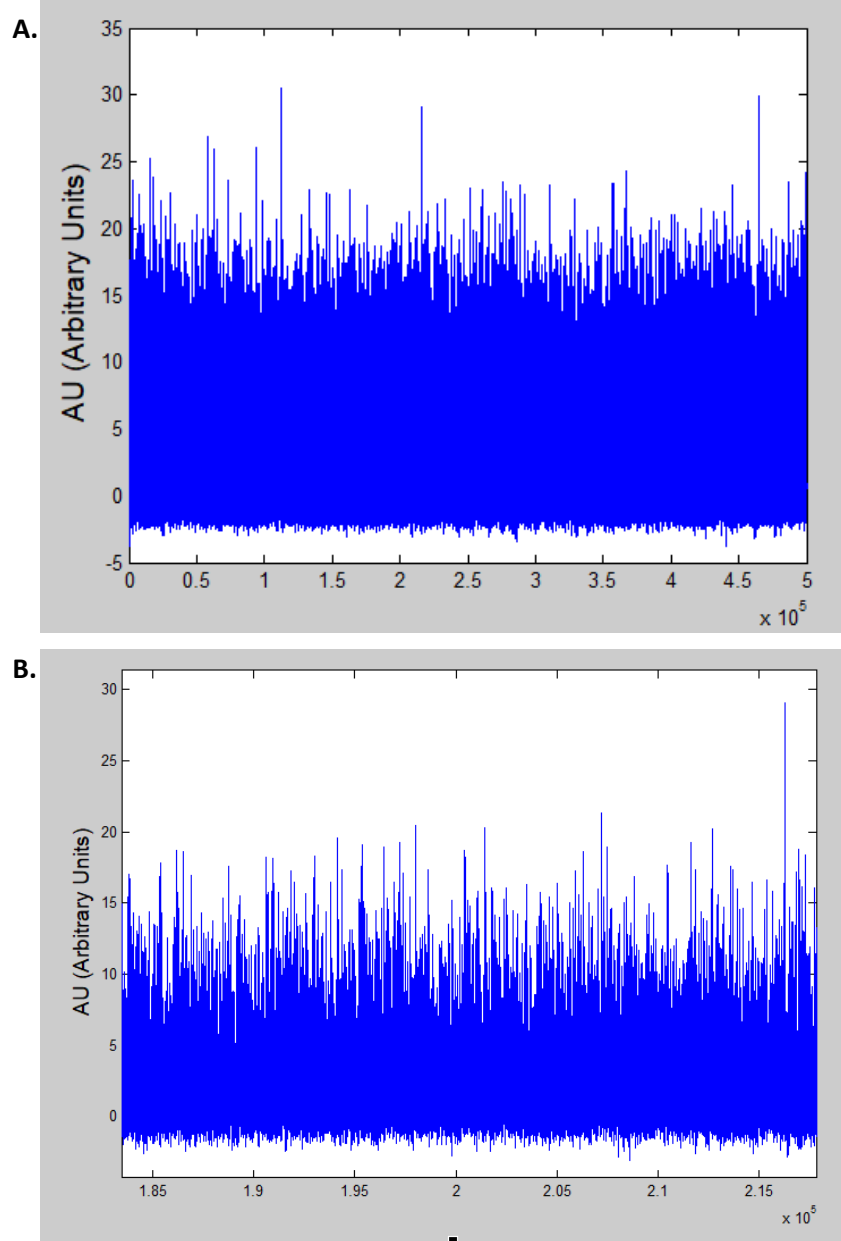

Figure S3: A) Entire simulated data trace with  $\lambda = 0.1$ . B) Zoomed in section to show detail.

## MATLAB code:

```
tic
clear all
% close all

PerformAutocorrelation = 0;
Reducing = 0;
datatype = 1; %0 for .bin and 1 for xls
plot_irf = 0;
plot_events = 0;
%% Load data
if datatype == 0
    Filename = '\\10.164.16.153\Data\Scott
Griffin\deconvolution\DoxycyclineHyclate\08-Aug-
2017_16_12_28Channel_B_Raw_Data.bin'; % '\\10.164.16.153\Data\Scott
Griffin\deconvolution\DoxycyclineHyclate\08-Aug-
2017_16_12_28Channel_B_Raw_Data.bin';
    fid = fopen(Filename);
    filter = 100;
    Range = 200; %input range for alazar card
    Buffers = 35; %amount of concatenated hits
    corrected_split_data = zeros(2450000,Buffers);
    reduction = 1;
    Data = fread(fid,'uint16'); %dlmread(Filename,'\t');
    %% Convert into voltage and make positive
    Rescaled_Data = ((Data / 2^15) * -Range) + Range; %converts to voltage,
flips to positive for ease of visualization, and shifts baseline towards 0
    split_data = reshape(Rescaled_Data,[],Buffers); %splits up the data into
the individual impact events
    for i = 1:Buffers;
        baseline = mean(split_data(1:40000,i)); %finds the mean of the first
millisecond of data in each trace
        corrected_split_data(:,i) = (split_data(:,i)-baseline); %subtracts the
baseline mean from the corresponding trace and saves them
    end
end

if datatype == 1
    Filename = '\\10.164.16.153\Data\Scott Griffin\deconvolution\ROC
plot\TimeTraces&GroundTruth\TimeTrace9.csv';
    Rescaled_Data = csvread(Filename,0,0);
    Filename2 = '\\10.164.16.153\Data\Scott Griffin\deconvolution\ROC
plot\true_irf.csv';
    GroundTruthData = csvread(Filename2,0,0);
    filter = 100;
    reduction = 1;
    Buffers = 1;
    corrected_split_data = Rescaled_Data;
end
IRFs = xlsread('\\10.164.16.153\Data\Scott
Griffin\deconvolution\Gaus_IRF.xlsx');
%% This section cuts out the important part of the data for the smashing
event
for i = 1:Buffers
```

```

    maximums(:,i) = max(corrected_split_data(:,i)); % finds max values for
each hit
end

for i = 1:Buffers % This loop finds the beginning and end of each event
    temp3 = find(corrected_split_data(:,i) == maximums(i)); %pulls out the
correct max value for the impact event
    if size(temp3) > 1
        value1(i) = 0;
        value2(i) = 0;
    elseif size(temp3) == 1
        value1(i) = find(corrected_split_data(:,i) == maximums(i));
        value2(i) = find(corrected_split_data(:,i) == maximums(i));
        while corrected_split_data(value1(i),i) > 0
            if corrected_split_data(value1(i),i) > 0
                value1(i) = value1(i) - 1; % stored values for the beginning
of events
            end
        end
        while corrected_split_data(value2(i),i) > 0
            if corrected_split_data(value2(i),i) > 0
                value2(i) = value2(i) + 1; % stored values for the end of
events
            end
        end
    end
end
recovered_events = cell(1,Buffers);
recovered_irf = cell(1,Buffers);
for n = 1:Buffers
    if value1(n) == 0
        n = n + 1;
    end
    Reduced_Data = corrected_split_data;
%% Create baseline correcting high-pass filter and apply it
    x_hp = linspace(-3,3);
    pdf = normpdf(x_hp,0,1);
    pdf_normalized = -pdf/sum(pdf);
    impulse = zeros(1,100);
    for i = 1:length(x_hp)
        if i == 50
            impulse(1,i) = abs(sum(pdf_normalized));
        else
            impulse(1,i) = 0;
        end
    end
    final_filter = pdf_normalized + impulse;
    Reduced_Data = conv(final_filter,Reduced_Data); %applies the filter
    Reduced_Data = Reduced_Data(50:length(Reduced_Data)-50); %gets rid of the
extra points added by the convolution
    %% Fit
    filtersize = filter/reduction; %size of data transient
    irf_results = zeros(filtersize,1); %preallocate memory for speed
    delta = 0;
    how_many = 1; %how many different MuGuess values you want to use for the
IRF Guess. Not really needed.
    x = linspace(.1,5,filtersize);

```



```

        if isempty(NegIndex)
            More = 0;
        else
            P_prime = P_prime(:,Index);
        end
    end
    conc_prime = P_prime\data_prime;
    %% Puts the photon amplitudes together with the arrival times
    Ampl_prime = zeros(filtersize,1);
    for j = 1:size(P_prime,2)
        index = find(P_prime(:,j)==decay_guess(1));
        Ampl_prime(index)= conc_prime(j);
    end
    if isempty(P_prime)
    else
        data(startpoint:endpoint) = data(startpoint:endpoint) -
(P_prime(:,1)*Ampl_prime(1));
    end
    data_fit(startpoint,1) = Ampl_prime(1); %creates the final
array of recovered photon amplitudes and arrival times
    new_start = find(Ampl_prime ~= 0);
    new_start = new_start(new_start(:) >= 2);
    if isempty(new_start) == 1 || new_start(end) <= 1
        startpoint = startpoint + filtersize;
        endpoint = endpoint + filtersize;
    else
        startpoint = new_start(1) + startpoint - 1 ;
        endpoint = endpoint + new_start(1) - 1;
    end
end

I = eye(filtersize,filtersize); %identity matrix for calculating
the weighted convolution matrix
M = conv2(data_fit,I); % new 'P' matrix for recovering the IRF
M = M(1:length(M)-(length(I)-1),:); %needs to be cut down to be
the proper length
%% calculates the irf and decides if the fit is good enough
irf = M\Reduced_Data;
irf = irf/sum(irf);
if counter >= 1
    Past_Diff = Diff;
    Past_nonzero = nonzero;
end
Diff = norm(irf - decay_guess); %Euclidian distance between the
recovered IRF and the guess used for the convergence condition
nonzero = length(find(data_fit>Threshold)); %count how many
photon events were recovered
if counter >= 1
    comparison_Diff = Diff - Past_Diff;
    if comparison_Diff < 0
        condition1 = 1;
    else
        condition1 = 0;
    end
end
if condition1 == 1
    decay_guess = irf;
end

```



```

        else
            keepgoing = 0;
            final_Diff = Past_Diff;
            final_nonzero = Past_nonzero;
            [irf2,final_nonzero2,data_fit_final] =
NNMF_IRF_testing_part2(irf,Reduced_Data); %Sends the results to a final
iteration of the algorithm
            %% 'annealing' step where a non-converging result has noise
added to help it converge by moving it away from the local minima
            if final_nonzero2 < 1500 || sum(isnan(irf2)) > 0
                if sum(isnan(irf2)) > 0
                    decay_guess = IRFs(k,:)'/5 + normrnd(0,1,100,1);
                    keepgoing = 1;
                else
                    keepgoing = 1;
                    decay_guess = irf2/5 + normrnd(0,1,100,1);
                end
            else
                keepgoing = 0;
            end
        end
        counter = counter + 1
    end
    results(:,k) = vertcat(MuGuess,final_Diff,final_nonzero2);
    data_results(:,k) = data_fit_final;
    irf_results(:,k) = irf2;
end
minimums = min(results,[],2);
location = find(results(2,:) == minimums(2));
recovered_events{:,n} = data_results(:,location);
recovered_irf{:,n} = irf_results(:,location);
end

%% autocorrelation or recovered data
if PerformAutocorrelation == 1
    FT1=fft(data_results(:,location)); %FT along vib mirror time axis
    FTFT1=gmultiply(FT1,conj(FT1)); %FTFT* = square mag FT
    clear FT1;
    AC1=real(ifft(FTFT1)); %iFT(FTFT*)=AC
    clear FTFT1;
    AC_deconvolved = AC1(1:floor(length(data)/2));

    figure3 = figure;
    plot(AC_deconvolved,'LineWidth',2);
    xlabel({'Data'},'FontSize',14);
    ylabel({'Autocorrelogram'},'FontSize',14);
    title({'Autocorrelogram of deconvolved data'},'FontSize',14);
end
toc

```
